# Supplementary material
Source: PubMed Central journal article supplement (PMC4224174)
Supplement: 6c03082d5c5078d56656cf7b6653a15a_genetics.114.169052-2.pdf [file 6c03082d5c5078d56656cf7b6653a15a_genetics.114.169052-2.pdf]

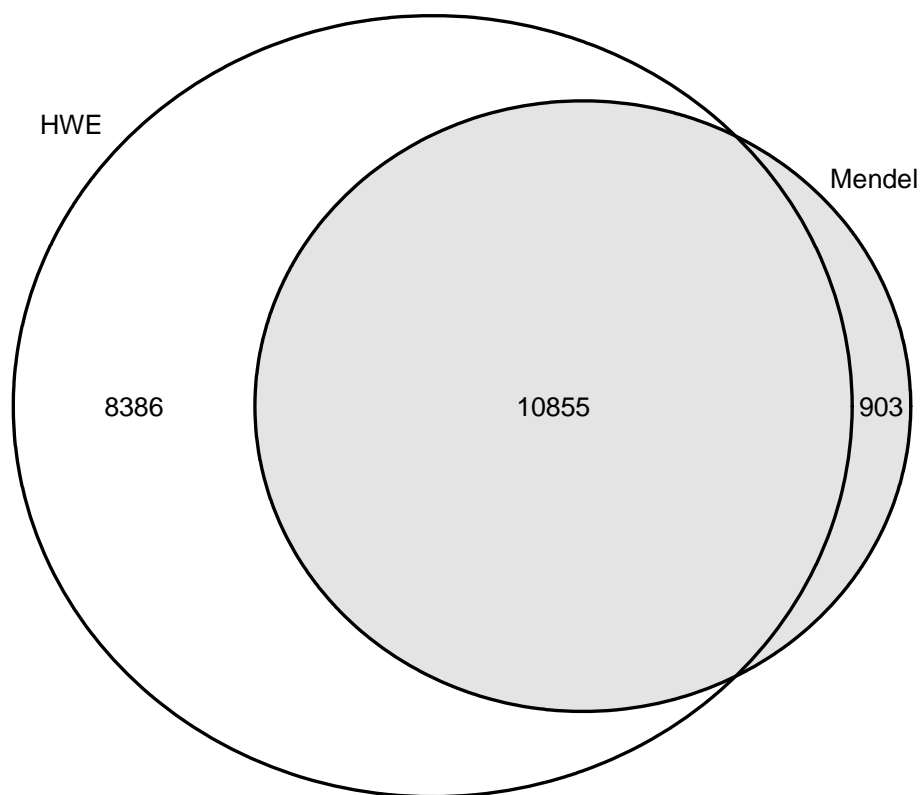

**Figure S4** Number of high-quality SNPs from the real data that pass a Hardy-Weinberg test or the Mendelian inheritance filter. SNPs have already been filtered for quality and proportion of missing data. The Mendelian inheritance filter is more rigorous: 44% of the SNPs that pass the HWE test fail MendelChecker but only 8% of the SNPs that pass MendelChecker fail HWE.
