# Supplementary material
Source: PubMed Central journal article supplement (PMC4224174)
Supplement: c931e379051bbc3285c8c510f8df4bf7_genetics.114.169052-4.pdf [file c931e379051bbc3285c8c510f8df4bf7_genetics.114.169052-4.pdf]

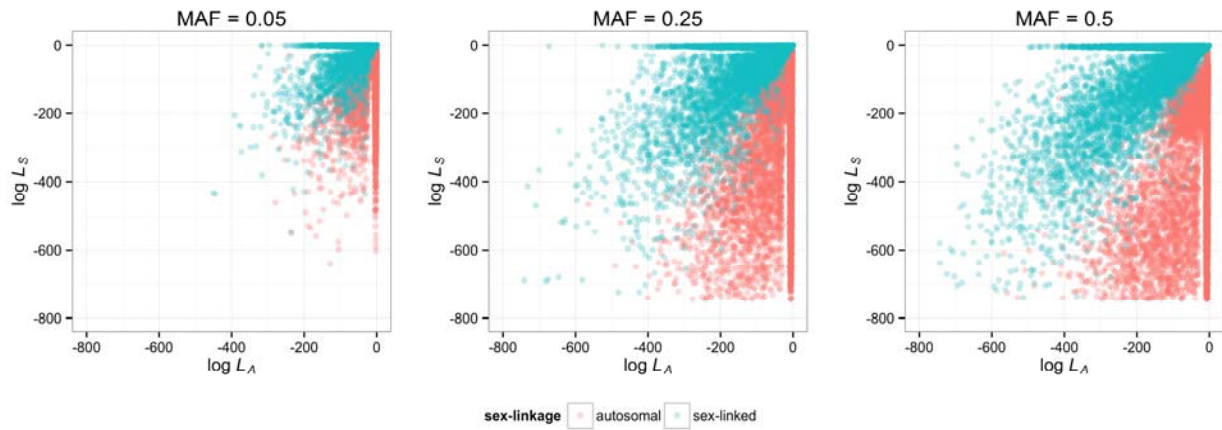

**Figure S2** Pedigree likelihoods can be used to identify sex-linked sites. We simulated autosomal (pink) and sex-linked (blue) SNPs with medium to high quality genotypes and 0-20% missing data in 10 trios. For each SNP, we plot the likelihood of the pedigree under an autosomal model of inheritance ( $L_A$ ) and the likelihood of the pedigree under a sex-linked model of inheritance ( $L_S$ ). Plots are shown for SNPs with a MAF of 0.05, 0.25, and 0.5. Autosomal SNPs and sex-linked SNPs have different pedigree likelihoods. Therefore we can classify SNPs as autosomal or sex-linked based on  $L_A$  and  $L_S$ .
